# Supplementary material for: Risk factors of lymph node metastasis or lymphovascular invasion for early gastric cancer: a practical and effective predictive model based on international multicenter data
Source: PubMed Central journal article supplement (PMC6836519; doi:10.1186/s12885-019-6147-6), 2019-11-06

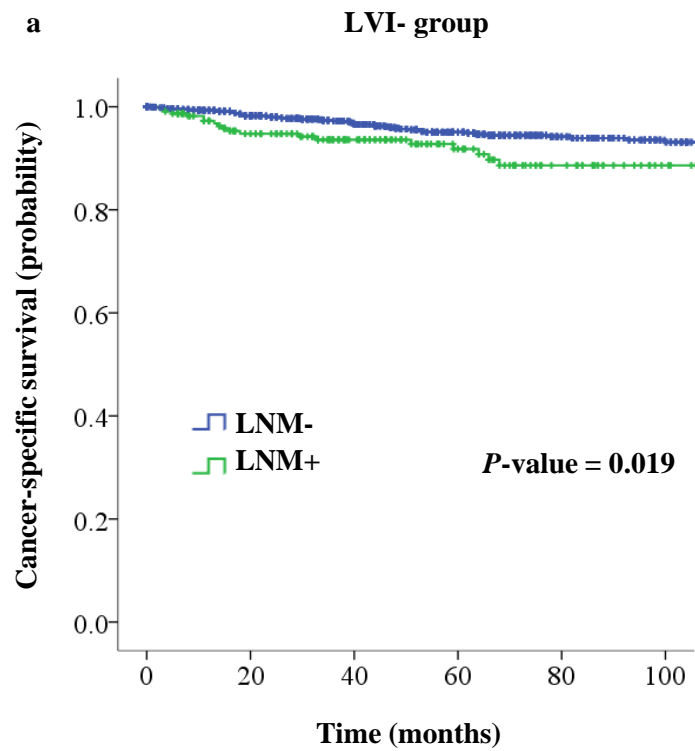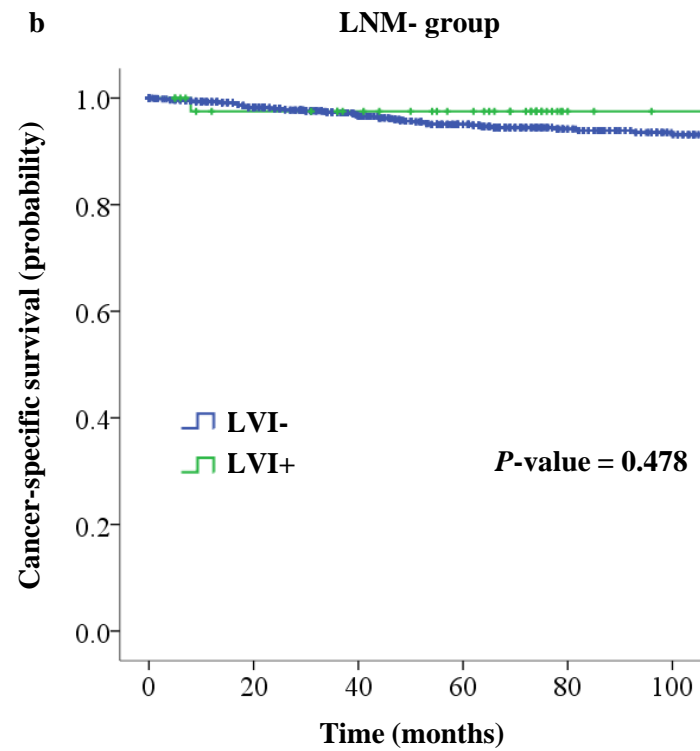

Supplement: 12885_2019_6147_MOESM1_ESM.pdf [file 12885_2019_6147_MOESM1_ESM.pdf]
